# Supplementary material for: Sleep loss differentially reconfigures neural circuits governing pain and neuropsychological homeostasis
Source: Research Square preprint supplement (doi:10.21203/rs.3.rs-8228487/v1), 2025-12-08
Supplement: Supplementary file 1 [file c5368ac34a7a509c9a9bcaf1.docx]

**Supplementary materials**

**Sleep loss differentially reconfigures neural circuits governing pain and neuropsychological homeostasis**

Teruyo Kishino, Yasuyuki Nagumo, Yusuke Hamada, Michiko Narita, Takumi Yoshizawa, Jion Takise, Tomohisa Mori, Yukari Suda, Naoko Kuzumaki, Minoru Narita

Contents:

Supplementary Table

Supplementary Table. 1: Primer sequences used by RT-qPCR.

Supplementary Fig. 1: Regional expression patterns of opioid-related genes under sleep-deprived conditions.

**Supplementary Table 1. Primer sequences used by RT-qPCR.**


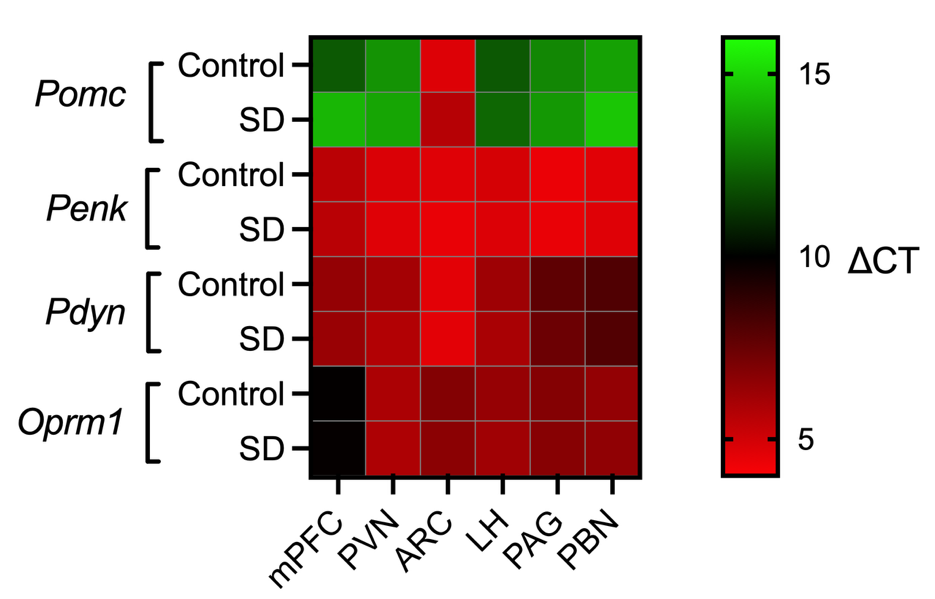
**Supplementary Fig. 1. Region-specific expression landscapes of opioid-related transcripts following sleep deprivation.**

Heatmaps illustrate relative mRNA abundance (ΔCt values) of *Pomc,* *Penk*, *Pdyn*, and *Oprm1* across the medial prefrontal cortex (mPFC), paraventricular nucleus (PVN), arcuate nucleus (ARC), lateral hypothalamus (LH), periaqueductal gray (PAG), and parabrachial nucleus (PBN) in control and sleep-deprived mice. A lower ΔCt reflects higher gene expression.
